# Supplementary material
Source: publisher figshare collection journal article supplement (https://acs.figshare.com/ndownloader/files/14564345)
Supplement: Supplementary file 1 [file 14564345]

*Supporting Information for*

***Studies of arabinose and mannose related anionic species, and comparison to  
ribose and fructose***

*Zhen Zeng, Elliot R. Bernstein\**

Department of Chemistry, NSF ERC for Extreme Ultraviolet Science and Technology, Colorado State  
University, Fort Collins, CO 80523, USA

AUTHOR INFORMATION

**Corresponding Author**

\*Elliot R. Bernstein, E-mail: [erb@lamar.colostate.edu](mailto:erb@lamar.colostate.edu).

More low energy isomers of (arabinose-H)<sup>-</sup>, (arabinose-H<sub>2</sub>O)<sup>-</sup>, (mannose-H)<sup>-</sup>, and (mannose-H<sub>2</sub>O)<sup>-</sup> anions are summarized in Figures S5 to S6, and S8 to S9 in the Supporting Information. Note that the figure numbers in the S.I. document are related to those of the text figures, as for example Figure S5 ⇔ Figure 5.

|                             |                                                                                     |                                                                                     |                                                                                      |                                                                                       |
|-----------------------------|-------------------------------------------------------------------------------------|-------------------------------------------------------------------------------------|--------------------------------------------------------------------------------------|---------------------------------------------------------------------------------------|
| Optimized Anionic structure | 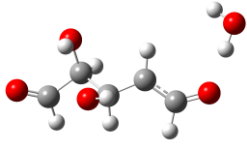   |    |    |    |
| Structural Polymorphism     | open chain (B) – (5C)H                                                              | β-furanose – (1)H                                                                   | open chain (A) – (4C)H                                                               | open chain (A) – (3)H                                                                 |
| ΔE (eV)                     | 0.00                                                                                | 0.39                                                                                | 0.40                                                                                 | 0.45                                                                                  |
| VDE (eV)                    | <b>3.52</b>                                                                         | <b>3.82</b>                                                                         | <b>4.51</b>                                                                          | <b>4.07</b>                                                                           |
| Optimized Anionic structure |    |    |    |    |
| Structural Polymorphism     | open chain (B) – (2)H                                                               | open chain (B) – (2C)H                                                              | open chain (A) – (2C)H                                                               | β-furanose – (1)H                                                                     |
| ΔE (eV)                     | 0.52                                                                                | 0.53                                                                                | 0.56                                                                                 | 0.63                                                                                  |
| VDE (eV)                    | <b>3.96</b>                                                                         | <b>2.62</b>                                                                         | <b>2.50</b>                                                                          | <b>3.92</b>                                                                           |
| Optimized Anionic structure |   |   |  |   |
| Structural Polymorphism     | β-pyranose – (1)H                                                                   | β-furanose – (5C)H                                                                  | β-furanose – (3C)H                                                                   | open chain (B) – (4)H                                                                 |
| ΔE (eV)                     | 0.65                                                                                | 0.70                                                                                | 0.74                                                                                 | 0.85                                                                                  |
| VDE (eV)                    | <b>3.50</b>                                                                         | <b>3.55</b>                                                                         | <b>3.67</b>                                                                          | <b>3.31</b>                                                                           |
| Optimized Anionic structure |  |  |  |  |
| Structural Polymorphism     | open chain (B) – (3)H                                                               | open chain (A) – (4)H                                                               | β-pyranose – (4C)H                                                                   | β-pyranose – (3)H                                                                     |
| ΔE (eV)                     | 0.96                                                                                | 0.97                                                                                | 0.98                                                                                 | 0.98                                                                                  |
| VDE (eV)                    | <b>4.01</b>                                                                         | <b>3.47</b>                                                                         | <b>3.35</b>                                                                          | <b>3.13</b>                                                                           |
| Optimized Anionic structure |  |  |  |  |
| Structural Polymorphism     | open chain (B) – (5)H                                                               | β-pyranose – (2)H                                                                   | open chain (A) – (5)H                                                                | β-furanose – (3)H                                                                     |
| ΔE (eV)                     | 1.04                                                                                | 1.21                                                                                | 1.24                                                                                 | 1.39                                                                                  |
| VDE (eV)                    | <b>3.17</b>                                                                         | <b>2.83</b>                                                                         | <b>3.19</b>                                                                          | <b>2.77</b>                                                                           |

|                             |                           |                           |                           |                           |
|-----------------------------|---------------------------|---------------------------|---------------------------|---------------------------|
| Optimized Anionic structure |                           |                           |                           |                           |
| Structural Polymorphism     | $\beta$ -furanose – (2)H  | open chain (A) – (3C)H    | open chain (B) – (1C)H    | open chain (A) – (1C)H    |
| $\Delta E$ (eV)             | 1.50                      | 1.51                      | 1.14                      | 1.74                      |
| VDE (eV)                    | <b>2.83</b>               | <b>3.67</b>               | <b>2.56</b>               | <b>2.35</b>               |
| Optimized Anionic structure |                           |                           |                           |                           |
| Structural Polymorphism     | $\beta$ -pyranose – (4)H  | $\beta$ -furanose – (2C)H | open chain (B) – (4C)H    | $\beta$ -furanose – (4C)H |
| $\Delta E$ (eV)             | 1.38                      | 2.25                      | 2.29                      | 2.44                      |
| VDE (eV)                    | <b>2.42</b>               | <b>1.80</b>               | <b>1.74</b>               | <b>1.74</b>               |
| Optimized Anionic structure |                           |                           |                           |                           |
| Structural Polymorphism     | $\beta$ -pyranose – (2C)H | $\beta$ -furanose – (1C)H | $\beta$ -pyranose – (1C)H | open chain (A) – (5C)H    |
| $\Delta E$ (eV)             | 2.44                      | 2.58                      | 2.63                      | 2.69                      |
| VDE (eV)                    | <b>1.97</b>               | <b>2.14</b>               | <b>1.92</b>               | <b>1.57</b>               |
| Optimized Anionic structure |                           |                           |                           |                           |
| Structural Polymorphism     | $\beta$ -pyranose – (3C)H |                           |                           |                           |
| $\Delta E$ (eV)             | 2.79                      |                           |                           |                           |
| VDE (eV)                    | <b>1.22</b>               |                           |                           |                           |

Figure S5 Optimized geometries of the typical low energy anionic isomers of (arabinose – H)<sup>–</sup> based on B3LYP/6-311++G(d,p) calculations. The relative energies and structural polymorphs are indicated. The structural presentation is the same as those in the main text Figures 4-9. For open chain structures (1)C to (5)C is ordered from left to right. For both furanose and pyranose structures (1)C to (5)C is ordered from right to left in a clockwise direction.

|                             |                                                                                     |                                                                                     |                                                                                      |                                                                                       |
|-----------------------------|-------------------------------------------------------------------------------------|-------------------------------------------------------------------------------------|--------------------------------------------------------------------------------------|---------------------------------------------------------------------------------------|
| Optimized Anionic structure | 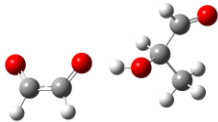   |    |    |    |
| Structural Polymorphism     | open chain (B) – (2)H – (5)OH                                                       | open chain (A) – (2)H – (5)OH                                                       | open chain (B) – (2)H – (4)OH                                                        | open chain (B) – (5C)H – (3)OH                                                        |
| $\Delta E$ (eV)             | 0.00                                                                                | 0.13                                                                                | 0.21                                                                                 | 0.22                                                                                  |
| VDE (eV)                    | <b>2.90</b>                                                                         | <b>2.63</b>                                                                         | <b>3.06</b>                                                                          | <b>1.95</b>                                                                           |
| Optimized Anionic structure |    |    |    |    |
| Structural Polymorphism     | open chain (B) – (2)H – (4)OH                                                       | open chain (B) – (5C)H – (3)OH                                                      | $\beta$ -furanose – (1)H – (5)OH                                                     | open chain (A) – (2)H – (4)OH                                                         |
| $\Delta E$ (eV)             | 0.25                                                                                | 0.30                                                                                | 0.30                                                                                 | 0.33                                                                                  |
| VDE (eV)                    | <b>3.15</b>                                                                         | <b>1.97</b>                                                                         | <b>2.87</b>                                                                          | <b>2.98</b>                                                                           |
| Optimized Anionic structure |    |    |    |    |
| Structural Polymorphism     | open chain (B) – (5C)H – (2)OH                                                      | open chain (B) – (2C)H – (3)OH                                                      | $\beta$ -furanose – (3C)H – (5)OH                                                    | open chain (A) – (2C)H – (3)OH                                                        |
| $\Delta E$ (eV)             | 0.49                                                                                | 0.68                                                                                | 0.76                                                                                 | 0.91                                                                                  |
| VDE (eV)                    | <b>3.80</b>                                                                         | <b>1.50</b>                                                                         | <b>1.56</b>                                                                          | <b>1.36</b>                                                                           |
| Optimized Anionic structure |  |  |  |  |
| Structural Polymorphism     | open chain (A) – (2C)H – (3)OH                                                      | open chain (A) – (3)H – (5)OH                                                       | open chain (B) – (3)H – (5)OH                                                        | open chain (B) – (2C)H – (3)OH                                                        |
| $\Delta E$ (eV)             | 0.91                                                                                | 1.04                                                                                | 1.04                                                                                 | 1.06                                                                                  |
| VDE (eV)                    | <b>1.36</b>                                                                         | <b>1.74</b>                                                                         | <b>1.74</b>                                                                          | <b>1.38</b>                                                                           |
| Optimized Anionic structure |  |  |  |  |
| Structural Polymorphism     | open chain (A) – (3)H – (2)OH                                                       | open chain (A) – (4)H – (2)OH                                                       | open chain (A) – (3)H – (2)OH                                                        | open chain (A) – (4C)H – (5)OH                                                        |
| $\Delta E$ (eV)             | 1.20                                                                                | 1.25                                                                                | 1.29                                                                                 | 1.36                                                                                  |
| VDE (eV)                    | <b>4.09</b>                                                                         | <b>3.54</b>                                                                         | <b>4.03</b>                                                                          | <b>2.32</b>                                                                           |
| Optimized Anionic structure |  |  |  |  |
| Structural Polymorphism     | open chain (A) – (2C)H – (3)OH                                                      | open chain (A) – (5)H – (2)OH                                                       | $\beta$ -furanose – (2)H – (5)OH                                                     | open chain (B) – (3)H – (2)OH                                                         |

|                             |                                                                                     |                                                                                     |                                                                                      |                                                                                       |
|-----------------------------|-------------------------------------------------------------------------------------|-------------------------------------------------------------------------------------|--------------------------------------------------------------------------------------|---------------------------------------------------------------------------------------|
| $\Delta E$ (eV)             | 1.39                                                                                | 1.41                                                                                | 1.43                                                                                 | 1.47                                                                                  |
| <b>VDE (eV)</b>             | <b>1.47</b>                                                                         | <b>4.25</b>                                                                         | <b>1.57</b>                                                                          | <b>3.77</b>                                                                           |
| Optimized Anionic structure | 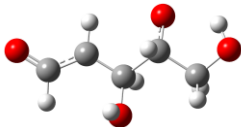   |    |    |    |
| Structural Polymorphism     | open chain (B) – (4)H – (2)OH                                                       | open chain (A) – (3)H – (4)OH                                                       | $\beta$ -furanose – (1)H – (3)OH                                                     | open chain (A) – (3)H – (2)OH                                                         |
| $\Delta E$ (eV)             | 1.56                                                                                | 1.57                                                                                | 1.59                                                                                 | 1.61                                                                                  |
| <b>VDE (eV)</b>             | <b>3.94</b>                                                                         | <b>3.96</b>                                                                         | <b>3.55</b>                                                                          | <b>3.57</b>                                                                           |
| Optimized Anionic structure |    |    |    |    |
| Structural Polymorphism     | open chain (B) – (4)H – (2)OH                                                       | $\beta$ -furanose – (3C)H – (2)OH                                                   | open chain (B) – (4C)H – (5)OH                                                       | $\beta$ -pyranose – (1)H – (2)OH                                                      |
| $\Delta E$ (eV)             | 1.62                                                                                | 1.63                                                                                | 1.63                                                                                 | 1.64                                                                                  |
| <b>VDE (eV)</b>             | <b>4.05</b>                                                                         | <b>3.41</b>                                                                         | <b>1.09</b>                                                                          | <b>3.36</b>                                                                           |
| Optimized Anionic structure |   |   |   |   |
| Structural Polymorphism     | $\beta$ -furanose – (3C)H – (1)OH                                                   | open chain (B) – (5)H – (2)OH                                                       | open chain (B) – (4C)H – (5)OH                                                       | open chain (A) – (2C)H – (4)OH                                                        |
| $\Delta E$ (eV)             | 1.70                                                                                | 1.73                                                                                | 1.74                                                                                 | 1.75                                                                                  |
| <b>VDE (eV)</b>             | <b>1.39</b>                                                                         | <b>3.95</b>                                                                         | <b>2.67</b>                                                                          | <b>2.67</b>                                                                           |
| Optimized Anionic structure |  |  |  |  |
| Structural Polymorphism     | open chain (A) – (3)H – (4)OH                                                       | open chain (B) – (2C)H – (4)OH                                                      | open chain (B) – (2C)H – (5)OH                                                       | open chain (A) – (3)H – (5)OH                                                         |
| $\Delta E$ (eV)             | 1.76                                                                                | 1.77                                                                                | 1.77                                                                                 | 1.82                                                                                  |
| <b>VDE (eV)</b>             | <b>3.41</b>                                                                         | <b>2.63</b>                                                                         | <b>2.89</b>                                                                          | <b>3.62</b>                                                                           |
| Optimized Anionic structure |  |  |  |  |
| Structural Polymorphism     | open chain (A) – (4C)H – (3)OH                                                      | $\beta$ -furanose – (1)H – (2)OH                                                    | $\beta$ -furanose – (1)H – (2)OH                                                     | open chain (B) – (2)H – (3)OH                                                         |
| $\Delta E$ (eV)             | 1.83                                                                                | 1.85                                                                                | 1.86                                                                                 | 1.89                                                                                  |
| <b>VDE (eV)</b>             | <b>0.41</b>                                                                         | <b>3.40</b>                                                                         | <b>3.39</b>                                                                          | <b>3.21</b>                                                                           |

|                             |                                                                                     |                                                                                     |                                                                                      |                                                                                       |
|-----------------------------|-------------------------------------------------------------------------------------|-------------------------------------------------------------------------------------|--------------------------------------------------------------------------------------|---------------------------------------------------------------------------------------|
| Optimized Anionic structure | 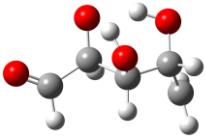   |    |     |    |
| Structural Polymorphism     | open chain (B) – (2)H – (5)OH                                                       | $\beta$ -pyranose – (1)H – (3)OH                                                    | $\beta$ -pyranose – (4C)H – (1)OH                                                    | open chain (A) – (2)H – (3)OH                                                         |
| $\Delta E$ (eV)             | 1.92                                                                                | 1.92                                                                                | 1.92                                                                                 | 1.93                                                                                  |
| VDE (eV)                    | <b>3.97</b>                                                                         | <b>3.20</b>                                                                         | <b>0.83</b>                                                                          | <b>3.28</b>                                                                           |
| Optimized Anionic structure |    |    |    |    |
| Structural Polymorphism     | open chain (B) – (4)H – (3)OH                                                       | open chain (A) – (2)H – (5)OH                                                       | open chain (A) – (3)H – (5)OH                                                        | $\beta$ -pyranose – (1)H – (4)OH                                                      |
| $\Delta E$ (eV)             | 1.93                                                                                | 1.94                                                                                | 1.96                                                                                 | 1.97                                                                                  |
| VDE (eV)                    | <b>3.53</b>                                                                         | <b>3.01</b>                                                                         | <b>4.13</b>                                                                          | <b>3.17</b>                                                                           |
| Optimized Anionic structure |    |    |    |    |
| Structural Polymorphism     | open chain (B) – (4)H – (3)OH                                                       | open chain (B) – (2)H – (3)OH                                                       | open chain (A) – (5)H – (3)OH                                                        | open chain (A) – (4)H – (3)OH                                                         |
| $\Delta E$ (eV)             | 1.97                                                                                | 1.97                                                                                | 1.99                                                                                 | 2.00                                                                                  |
| VDE (eV)                    | <b>3.20</b>                                                                         | <b>3.56</b>                                                                         | <b>3.97</b>                                                                          | <b>3.10</b>                                                                           |
| Optimized Anionic structure |  |  |  |  |
| Structural Polymorphism     | open chain (B) – (5)H – (2)OH                                                       | $\beta$ -furanose – (1)H – (5)OH                                                    | open chain (B) – (3)H – (4)OH                                                        | open chain (B) – (5)H – (3)OH                                                         |
| $\Delta E$ (eV)             | 2.03                                                                                | 2.03                                                                                | 2.06                                                                                 | 2.06                                                                                  |
| VDE (eV)                    | <b>4.49</b>                                                                         | <b>3.95</b>                                                                         | <b>3.48</b>                                                                          | <b>3.17</b>                                                                           |
| Optimized Anionic structure |  |  |  |  |
| Structural Polymorphism     | open chain (A) – (4)H – (3)OH                                                       | $\beta$ -furanose – (5C)H – (2)OH                                                   | $\beta$ -furanose – (1)H – (2)OH                                                     | open chain (A) – (4C)H – (3/4)OH                                                      |
| $\Delta E$ (eV)             | 2.10                                                                                | 2.11                                                                                | 2.15                                                                                 | 2.21                                                                                  |
| VDE (eV)                    | <b>3.26</b>                                                                         | <b>3.24</b>                                                                         | <b>3.19</b>                                                                          | <b>3.89</b>                                                                           |
| Optimized Anionic structure |  |  |  |  |
| Structural Polymorphism     | $\beta$ -pyranose – (3)H – (1)OH                                                    | open chain (B) – (5)H – (3)OH                                                       | $\beta$ -furanose – (3)H – (5)OH                                                     | open chain (B) – (2C)H – (2)OH                                                        |
| $\Delta E$ (eV)             | 2.22                                                                                | 2.23                                                                                | 2.23                                                                                 | 2.26                                                                                  |

| VDE (eV)                    | 2.93                                                                                | 3.48                                                                                | 3.73                                                                                 | 3.56                                                                                |
|-----------------------------|-------------------------------------------------------------------------------------|-------------------------------------------------------------------------------------|--------------------------------------------------------------------------------------|-------------------------------------------------------------------------------------|
| Optimized Anionic structure | 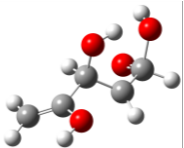   |    |    |  |
| Structural Polymorphism     | $\beta$ -pyranose – (4C)H – (2)OH                                                   | $\beta$ -pyranose – (3)H – (2)OH                                                    | open chain (A) – (2C)H – (2)OH                                                       | $\beta$ -furanose – (3C)H – (3)OH                                                   |
| $\Delta E$ (eV)             | 2.27                                                                                | 2.29                                                                                | 2.35                                                                                 | 2.42                                                                                |
| VDE (eV)                    | 3.26                                                                                | 3.03                                                                                | 3.27                                                                                 | 3.62                                                                                |
| Optimized Anionic structure |    |    |    |  |
| Structural Polymorphism     | open chain (B) – (4)H – (5)OH                                                       | $\beta$ -furanose – (5C)H – (5)OH                                                   | $\beta$ -furanose – (3)H – (2)OH                                                     | $\beta$ -furanose – (2)H – (1)OH                                                    |
| $\Delta E$ (eV)             | 2.44                                                                                | 2.53                                                                                | 2.53                                                                                 | 2.54                                                                                |
| VDE (eV)                    | 2.87                                                                                | 4.37                                                                                | 2.77                                                                                 | 2.35                                                                                |
| Optimized Anionic structure |    |    |    |  |
| Structural Polymorphism     | open chain (B) – (5)H – (4)OH                                                       | $\beta$ -pyranose – (3)H – (4)OH                                                    | open chain (B) – (3)H – (4)OH                                                        | open chain (A) – (5C)H – (3)OH                                                      |
| $\Delta E$ (eV)             | 2.55                                                                                | 2.57                                                                                | 2.61                                                                                 | 2.64                                                                                |
| VDE (eV)                    | 2.83                                                                                | 2.69                                                                                | 2.74                                                                                 | 2.88                                                                                |
| Optimized Anionic structure |  |  |  |                                                                                     |
| Structural Polymorphism     | $\beta$ -furanose – (3)H – (1)OH                                                    | $\beta$ -pyranose – (4C)H – (4)OH                                                   | $\beta$ -furanose – (5)H – (1)OH                                                     |                                                                                     |
| $\Delta E$ (eV)             | 2.66                                                                                | 2.67                                                                                | 2.83                                                                                 |                                                                                     |
| VDE (eV)                    | 2.80                                                                                | 3.83                                                                                | 2.92                                                                                 |                                                                                     |

Figure S6 Optimized geometries of the typical low energy anionic isomers of (arabinose – H<sub>2</sub>O)<sup>–</sup> based on B3LYP/6-311++G(d,p) calculations. The relative energies and structural polymorphs are indicated. The structural presentation is the same as those in the main text Figures 4-9. For open chain structures (1)C to (5)C is ordered from left to right. For both furanose and pyranose structures (1)C to (5)C is ordered from right to left in a clockwise direction.



|                             |                            |                             |                             |                            |
|-----------------------------|----------------------------|-----------------------------|-----------------------------|----------------------------|
| Optimized Anionic structure |                            |                             |                             |                            |
| Structural Polymorphism     | Open chian (A) – (5C)H     | Open chian (B) – (3C)H      | $\beta$ -D-furanose – (4C)H | $\beta$ -D-furanose – (3)H |
| $\Delta E$ (eV)             | 0.00                       | 0.05                        | 0.21                        | 0.25                       |
| VDE (eV)                    | <b>4.32</b>                | <b>3.84</b>                 | <b>4.43</b>                 | <b>4.28</b>                |
| Optimized Anionic structure |                            |                             |                             |                            |
| Structural Polymorphism     | $\beta$ -D-furanose – (1)H | $\beta$ -D-pyranose – (2)H  | Open chian (A) – (6C)H      | Open chian (B) – (5)H      |
| $\Delta E$ (eV)             | 0.38                       | 0.56                        | 0.58                        | 0.63                       |
| VDE (eV)                    | <b>4.24</b>                | <b>4.25</b>                 | <b>3.85</b>                 | <b>4.05</b>                |
| Optimized Anionic structure |                            |                             |                             |                            |
| Structural Polymorphism     | $\beta$ -D-furanose – (2)H | $\beta$ -D-pyranose – (4C)H | Open chian (B) – (5)H       | Open chian (A) – (6)H      |
| $\Delta E$ (eV)             | 0.65                       | 0.66                        | 0.69                        | 0.70                       |
| VDE (eV)                    | <b>3.96</b>                | <b>3.76</b>                 | <b>3.94</b>                 | <b>3.85</b>                |
| Optimized Anionic structure |                            |                             |                             |                            |
| Structural Polymorphism     | $\beta$ -D-pyranose – (1)H | $\beta$ -D-pyranose – (1)H  | $\beta$ -D-furanose – (1)H  | Open chian (A) – (5)H      |
| $\Delta E$ (eV)             | 0.70                       | 0.71                        | 0.71                        | 0.72                       |
| VDE (eV)                    | <b>4.05</b>                | <b>4.05</b>                 | <b>4.02</b>                 | <b>4.17</b>                |
| Optimized Anionic structure |                            |                             |                             |                            |
| Structural Polymorphism     | Open chian (B) – (4C)H     | $\beta$ -D-pyranose – (3)H  | Open chian (B) – (2)H       | Open chian (B) – (3)H      |
| $\Delta E$ (eV)             | 0.82                       | 0.83                        | 0.83                        | 0.85                       |
| VDE (eV)                    | <b>3.70</b>                | <b>3.90</b>                 | <b>3.76</b>                 | <b>3.48</b>                |



|                             |                                                                                     |                                                                                     |                                                                                       |                                                                                       |
|-----------------------------|-------------------------------------------------------------------------------------|-------------------------------------------------------------------------------------|---------------------------------------------------------------------------------------|---------------------------------------------------------------------------------------|
| Optimized Anionic structure | 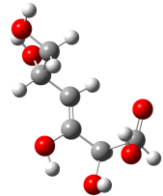   |    |     |    |
| Structural Polymorphism     | $\beta$ -D-furanose – (3C)H                                                         | Open chian (A) – (4)H                                                               | Open chian (B) – (4)H                                                                 | Open chian (A) – (3)H                                                                 |
| $\Delta E$ (eV)             | 0.87                                                                                | 0.88                                                                                | 0.90                                                                                  | 0.97                                                                                  |
| VDE (eV)                    | <b>3.50</b>                                                                         | <b>3.57</b>                                                                         | <b>4.02</b>                                                                           | <b>3.55</b>                                                                           |
| Optimized Anionic structure |    |    |    |    |
| Structural Polymorphism     | Open chian (B) – (2)H                                                               | Open chian (B) – (3)H                                                               | $\beta$ -D-furanose – (3)H                                                            | Open chian (B) – (2C)H                                                                |
| $\Delta E$ (eV)             | 1.00                                                                                | 1.04                                                                                | 1.14                                                                                  | 1.16                                                                                  |
| VDE (eV)                    | <b>3.65</b>                                                                         | <b>3.67</b>                                                                         | <b>3.35</b>                                                                           | <b>2.71</b>                                                                           |
| Optimized Anionic structure |    |    |    |    |
| Structural Polymorphism     | Open chian (A) – (2)H                                                               | Open chian (A) – (2)H                                                               | $\beta$ -D-furanose – (6)H                                                            | Open chian (A) – (2C)H                                                                |
| $\Delta E$ (eV)             | 1.26                                                                                | 1.26                                                                                | 1.31                                                                                  | 1.35                                                                                  |
| VDE (eV)                    | <b>3.15</b>                                                                         | <b>3.15</b>                                                                         | <b>2.95</b>                                                                           | <b>2.30</b>                                                                           |
| Optimized Anionic structure |  |  |   |  |
| Structural Polymorphism     | $\beta$ -D-pyranose – (4)H                                                          | Open chian (A) – (3C)H                                                              | Open chian (B) – (1C)H                                                                | Open chian (A) – (1C)H                                                                |
| $\Delta E$ (eV)             | 1.61                                                                                | 1.96                                                                                | 2.11                                                                                  | 2.13                                                                                  |
| VDE (eV)                    | <b>2.73</b>                                                                         | <b>3.05</b>                                                                         | <b>2.10</b>                                                                           | <b>1.99</b>                                                                           |
| Optimized Anionic structure |  |  |  |  |
| Structural Polymorphism     | $\beta$ -D-pyranose – (5C)H                                                         | $\beta$ -D-pyranose – (2C)H                                                         | $\beta$ -D-pyranose – (1C)H                                                           | $\beta$ -D-furanose – (2C)H                                                           |
| $\Delta E$ (eV)             | 2.13                                                                                | 2.18                                                                                | 2.63                                                                                  | 2.64                                                                                  |
| VDE (eV)                    | <b>2.31</b>                                                                         | <b>2.31</b>                                                                         | <b>2.26</b>                                                                           | <b>1.64</b>                                                                           |

|                             |                                                                                   |                                                                                   |                                                                                     |  |
|-----------------------------|-----------------------------------------------------------------------------------|-----------------------------------------------------------------------------------|-------------------------------------------------------------------------------------|--|
| Optimized Anionic structure | 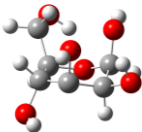 |  |  |  |
| Structural Polymorphism     | $\beta$ -D-pyranose – (3C)H                                                       | $\beta$ -D-furanose – (1C)H                                                       | $\beta$ -D-furanose – (6C)H                                                         |  |
| $\Delta E$ (eV)             | 2.70                                                                              | 2.80                                                                              | 2.83                                                                                |  |
| VDE (eV)                    | <b>1.83</b>                                                                       | <b>1.79</b>                                                                       | <b>1.57</b>                                                                         |  |

Figure S8 Optimized geometries of the typical low energy anionic isomers of (mannose – H)<sup>–</sup> based on B3LYP/6-311++G(d,p) calculations. The relative energies and structural polymorphs are indicated. The structural presentation is the same as those in the main text Figures 4-9. For open chain structures (1)C to (5)C is ordered from left to right. For both furanose and pyranose structures (1)C to (5)C is ordered from right to left in a clockwise direction.

|                             |                                                                                     |                                                                                     |                                                                                      |                                                                                       |
|-----------------------------|-------------------------------------------------------------------------------------|-------------------------------------------------------------------------------------|--------------------------------------------------------------------------------------|---------------------------------------------------------------------------------------|
| Optimized Anionic structure | 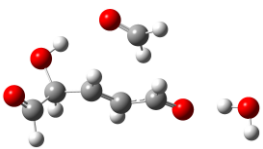   |    |    |    |
| Structural Polymorphism     | open chain (A) – (6)H – (4)OH                                                       | open chain (A) – (6)H – (4)OH                                                       | open chain (A) – (4)H – (2)OH                                                        | open chain (B) – (4)H – (2)OH                                                         |
| $\Delta E$ (eV)             | 0.00                                                                                | 0.03                                                                                | 0.03                                                                                 | 0.64                                                                                  |
| <b>VDE (eV)</b>             | <b>2.30</b>                                                                         | <b>1.91</b>                                                                         | <b>1.50</b>                                                                          | <b>1.11</b>                                                                           |
| Optimized Anionic structure |    |    |    |    |
| Structural Polymorphism     | open chain (A) – (3)H – (2)OH                                                       | open chain (A) – (6)H – (2)OH                                                       | open chain (A) – (6)H – (2)OH                                                        | open chain (A) – (2C)H – (3)OH                                                        |
| $\Delta E$ (eV)             | 0.68                                                                                | 0.68                                                                                | 0.70                                                                                 | 0.71                                                                                  |
| <b>VDE (eV)</b>             | <b>4.09</b>                                                                         | <b>4.30</b>                                                                         | <b>4.10</b>                                                                          | <b>0.87</b>                                                                           |
| Optimized Anionic structure |    |    |    |    |
| Structural Polymorphism     | open chain (C) – (4)H – (2)OH                                                       | open chain (A) – (5)H – (2)OH                                                       | open chain (A) – (3)H – (6)OH                                                        | $\beta$ -D-furanose – (3)H – (1)OH                                                    |
| $\Delta E$ (eV)             | 0.75                                                                                | 0.82                                                                                | 0.91                                                                                 | 0.97                                                                                  |
| <b>VDE (eV)</b>             | <b>3.90</b>                                                                         | <b>4.10</b>                                                                         | <b>4.19</b>                                                                          | <b>3.32</b>                                                                           |
| Optimized Anionic structure |  |  |  |  |
| Structural Polymorphism     | $\beta$ -D-furanose – (3)H – (1)OH                                                  | $\beta$ -D-furanose – (3)H – (6)OH                                                  | $\beta$ -D-furanose – (4C)H – (6)OH                                                  | $\beta$ -D-furanose – (2)H – (6)OH                                                    |
| $\Delta E$ (eV)             | 0.97                                                                                | 0.99                                                                                | 0.99                                                                                 | 0.99                                                                                  |
| <b>VDE (eV)</b>             | <b>3.32</b>                                                                         | <b>3.93</b>                                                                         | <b>4.31</b>                                                                          | <b>4.19</b>                                                                           |
| Optimized Anionic structure |  |  |  |  |
| Structural Polymorphism     | $\beta$ -D-pyranose – (2)H – (6)OH                                                  | open chain (A) – (4)H – (6)OH                                                       | $\beta$ -D-furanose – (1)H – (6)OH                                                   | open chain (A) – (4)H – (5)OH                                                         |
| $\Delta E$ (eV)             | 0.99                                                                                | 1.03                                                                                | 1.07                                                                                 | 1.08                                                                                  |
| <b>VDE (eV)</b>             | <b>4.20</b>                                                                         | <b>3.80</b>                                                                         | <b>3.89</b>                                                                          | <b>4.01</b>                                                                           |

|                             |                                                                                     |                                                                                     |                                                                                      |                                                                                       |
|-----------------------------|-------------------------------------------------------------------------------------|-------------------------------------------------------------------------------------|--------------------------------------------------------------------------------------|---------------------------------------------------------------------------------------|
| Optimized Anionic structure | 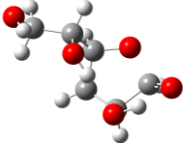   |    |    |    |
| Structural Polymorphism     | $\beta$ -D-furanose-(1)H-(3)OH                                                      | $\beta$ -D-furanose-(3)H-(2)OH                                                      | open chain (A)-(6)H-(3)OH                                                            | $\beta$ -D-pyranose-(2)H-(4)OH                                                        |
| $\Delta E$ (eV)             | 1.12                                                                                | 1.16                                                                                | 1.17                                                                                 | 1.17                                                                                  |
| VDE (eV)                    | <b>3.86</b>                                                                         | <b>3.71</b>                                                                         | <b>4.01</b>                                                                          | <b>3.32</b>                                                                           |
| Optimized Anionic structure |    |    |    |    |
| Structural Polymorphism     | $\beta$ -D-pyranose-(5)H-(2)OH                                                      | $\beta$ -D-furanose-(1)H-(5)OH                                                      | open chain (C)-(6)H-(4)OH                                                            | $\beta$ -D-furanose-(2)H-(5)OH                                                        |
| $\Delta E$ (eV)             | 1.18                                                                                | 1.19                                                                                | 1.25                                                                                 | 1.26                                                                                  |
| VDE (eV)                    | <b>4.18</b>                                                                         | <b>3.42</b>                                                                         | <b>5.37</b>                                                                          | <b>4.05</b>                                                                           |
| Optimized Anionic structure |   |   |   |   |
| Structural Polymorphism     | $\beta$ -D-furanose-(1)H-(2)OH                                                      | $\beta$ -D-pyranose-(6)H-(5)OH                                                      | $\beta$ -D-furanose-(3)H-(5)OH                                                       | open chain (A)-(6)H-(4)OH                                                             |
| $\Delta E$ (eV)             | 1.26                                                                                | 1.27                                                                                | 1.27                                                                                 | 1.29                                                                                  |
| VDE (eV)                    | <b>3.79</b>                                                                         | <b>5.57</b>                                                                         | <b>3.93</b>                                                                          | <b>3.24</b>                                                                           |
| Optimized Anionic structure |  |  |  |  |
| Structural Polymorphism     | $\beta$ -D-pyranose-(1)H-(6)OH                                                      | $\beta$ -D-pyranose-(3)H-(6)OH                                                      | open chain (A)-(3)H-(6)OH                                                            | open chain (A)-(4)H-(6)OH                                                             |
| $\Delta E$ (eV)             | 1.29                                                                                | 1.37                                                                                | 1.39                                                                                 | 1.33                                                                                  |
| VDE (eV)                    | <b>4.38</b>                                                                         | <b>3.90</b>                                                                         | <b>3.96</b>                                                                          | <b>3.31</b>                                                                           |
| Optimized Anionic structure |  |  |  |  |
| Structural Polymorphism     | $\beta$ -D-pyranose-(2)H-(3)OH                                                      | open chain (A)-(2)H-(3/4)OH                                                         | open chain (A)-(6)H-(3/4)OH                                                          | $\beta$ -D-pyranose-(2)H-(6)OH                                                        |
| $\Delta E$ (eV)             | 1.33                                                                                | 1.34                                                                                | 1.36                                                                                 | 1.37                                                                                  |
| VDE (eV)                    | <b>3.51</b>                                                                         | <b>5.06</b>                                                                         | <b>5.23</b>                                                                          | <b>3.76</b>                                                                           |

|                             |                                                                                     |                                                                                     |                                                                                      |                                                                                       |
|-----------------------------|-------------------------------------------------------------------------------------|-------------------------------------------------------------------------------------|--------------------------------------------------------------------------------------|---------------------------------------------------------------------------------------|
| Optimized Anionic structure | 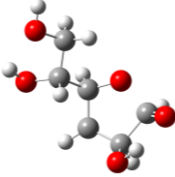   |    |    |    |
| Structural Polymorphism     | $\beta$ -D-furanose – (1)H – (3)OH                                                  | open chain (A) – (3)H – (5)OH                                                       | $\beta$ -D-furanose – (4C)H – (3)OH                                                  | $\beta$ -D-furanose – (5)H – (3)OH                                                    |
| $\Delta E$ (eV)             | 1.42                                                                                | 1.43                                                                                | 1.47                                                                                 | 1.50                                                                                  |
| VDE (eV)                    | <b>3.66</b>                                                                         | <b>3.42</b>                                                                         | <b>0.58</b>                                                                          | <b>3.53</b>                                                                           |
| Optimized Anionic structure |    |    |    |    |
| Structural Polymorphism     | $\beta$ -D-furanose – (2)H – (3)OH                                                  | $\beta$ -D-furanose – (2)H – (3)OH                                                  | open chain (A) – (6)H – (5)OH                                                        | open chain (A) – (6)H – (5)OH                                                         |
| $\Delta E$ (eV)             | 1.50                                                                                | 1.50                                                                                | 1.51                                                                                 | 1.55                                                                                  |
| VDE (eV)                    | <b>3.14</b>                                                                         | <b>3.13</b>                                                                         | <b>3.29</b>                                                                          | <b>3.38</b>                                                                           |
| Optimized Anionic structure |   |   |  |   |
| Structural Polymorphism     | $\beta$ -D-furanose – (3)H – (1)OH                                                  | $\beta$ -D-furanose – (1)H – (2)OH                                                  | $\beta$ -D-pyranose – (2)H – (1)OH                                                   | $\beta$ -D-furanose – (2)H – (1)OH                                                    |
| $\Delta E$ (eV)             | 1.57                                                                                | 1.62                                                                                | 1.75                                                                                 | 1.76                                                                                  |
| VDE (eV)                    | <b>2.76</b>                                                                         | <b>3.18</b>                                                                         | <b>3.08</b>                                                                          | <b>2.42</b>                                                                           |
| Optimized Anionic structure |  |  |  |  |
| Structural Polymorphism     | open chain (A) – (2)H – (3/4)OH                                                     | $\beta$ -D-pyranose – (3)H – (5)OH                                                  | open chain (A) – (4)H – (5)OH                                                        | $\beta$ -D-pyranose – (1)H – (5)OH                                                    |
| $\Delta E$ (eV)             | 1.79                                                                                | 1.82                                                                                | 1.85                                                                                 | 1.86                                                                                  |
| VDE (eV)                    | <b>5.90</b>                                                                         | <b>4.62</b>                                                                         | <b>3.11</b>                                                                          | <b>5.76</b>                                                                           |
| Optimized Anionic structure |  |  |  |  |
| Structural Polymorphism     | $\beta$ -D-pyranose – (6)H –                                                        | $\beta$ -D-pyranose – (6)H – (2)OH                                                  | open chain (B) – (6)H – (4)OH                                                        | $\beta$ -D-furanose – (5)H – (6)OH                                                    |

|                             |                                                                                   |             |             |             |
|-----------------------------|-----------------------------------------------------------------------------------|-------------|-------------|-------------|
|                             | (3)OH                                                                             |             |             |             |
| $\Delta E$ (eV)             | 1.88                                                                              | 2.02        | 2.07        | 2.16        |
| <b>VDE (eV)</b>             | <b>3.72</b>                                                                       | <b>4.20</b> | <b>3.13</b> | <b>2.58</b> |
|                             |                                                                                   |             |             |             |
| Optimized Anionic structure | 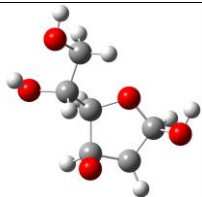 |             |             |             |
| Structural Polymorphism     | $\beta$ -D-furanose – (3)H<br>–<br>(2)OH                                          |             |             |             |
| $\Delta E$ (eV)             | 2.21                                                                              |             |             |             |
| <b>VDE (eV)</b>             | <b>2.59</b>                                                                       |             |             |             |

Figure S9 Optimized geometries of the typical low energy anionic isomers of (mannose – H<sub>2</sub>O)<sup>–</sup> based on B3LYP/6–311++G(d,p) calculations. The relative energies and structural polymorphs are indicated. The structural presentation is the same as those in the main text Figures 4-9. For open chain structures (1)C to (5)C is ordered from left to right. For both furanose and pyranose structures (1)C to (5)C is ordered from right to left in a clockwise direction.
